# Supplementary material
Source: MDPI journal article supplement (https://www.mdpi.com/2073-4441/13/21/3073)
Supplement: s1 [file s1]

## Supplementary material for the manuscript:

Assessment of Coagulation–Flocculation Process Efficiency for the Natural Organic Matter Removal in Drinking Water Treatment

Authors: Corina Petronela Mustereț, Irina Morosanu, Ramona Ciobanu, Oana Plavan, Andreea Gherghel, Malek Al-Refai, Ioana Roman, Carmen Teodosiu\*

**Table S1.** Characteristics of PAX XL 60 coagulant used.

| Characteristic                 | Unit               | Value |
|--------------------------------|--------------------|-------|
| Density                        | kg/dm <sup>3</sup> | 1303  |
| Al <sup>3+</sup>               | %                  | 7.38  |
| Al <sub>2</sub> O <sub>3</sub> | %                  | 13.94 |
| Basicity (OH <sup>-</sup> )    | %                  | 48.06 |
| Chloride (Cl <sup>-</sup> )    | %                  | 16.25 |
| pH                             | pH units           | 1.61  |

**Table S2.** Coagulation-flocculation efficiency scores considering multiple water quality indicators.

| Water quality indicator | PACl dose (mg Al/L) |    |    |    |    |    |
|-------------------------|---------------------|----|----|----|----|----|
|                         | 2                   | 3  | 4  | 5  | 6  | 7  |
| Cold temperature        |                     |    |    |    |    |    |
| COD                     | 4                   | 4  | 4  | 1  | 3  | 1  |
| DOC                     | 4                   | 5  | 4  | 4  | 4  | 4  |
| Residual Al             | 4                   | 4  | 3  | 4  | 2  | 2  |
| A254                    | 4                   | 3  | 3  | 2  | 1  | 1  |
| A280                    | 4                   | 5  | 4  | 4  | 3  | 3  |
| A365                    | 4                   | 4  | 3  | 2  | 3  | 3  |
| SUVA                    | 2                   | 2  | 2  | 2  | 1  | 1  |
| A254/A280               | 4                   | 5  | 5  | 4  | 4  | 3  |
| A254/A365               | 4                   | 4  | 4  | 1  | 5  | 5  |
| Total score             | 34                  | 36 | 32 | 24 | 26 | 23 |
| Warm temperature        |                     |    |    |    |    |    |
| COD                     | 4                   | 4  | 4  | 4  | 3  | 5  |
| DOC                     | 2                   | 2  | 2  | 2  | 2  | 1  |
| Residual Al             | 4                   | 3  | 3  | 3  | 4  | 5  |
| A254                    | 5                   | 3  | 1  | 1  | 1  | 1  |
| A280                    | 3                   | 2  | 2  | 2  | 2  | 2  |
| A365                    | 5                   | 4  | 2  | 3  | 3  | 2  |
| SUVA                    | 5                   | 3  | 3  | 2  | 2  | 3  |
| A254/A280               | 1                   | 1  | 2  | 2  | 2  | 3  |
| A254/A365               | 3                   | 5  | 3  | 5  | 5  | 3  |
| Total score             | 32                  | 27 | 22 | 24 | 24 | 25 |

\*The scores are on a scale of 1 (the best) to 5 (the worst). A minimum total score corresponds to the optimum dose.

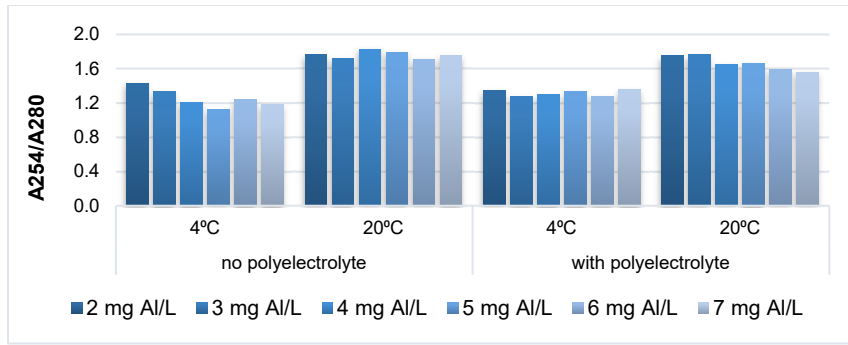

(a)

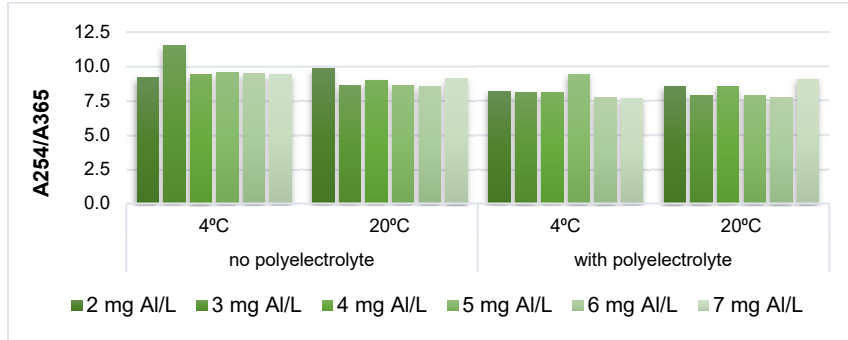

(b)

**Figure S1.** Absorbance ratios after the coagulation-flocculation tests: (a) A254/A280 ratio, (b) A254/A365.

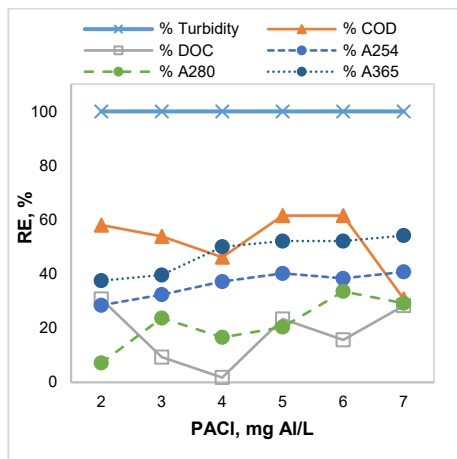

(a)

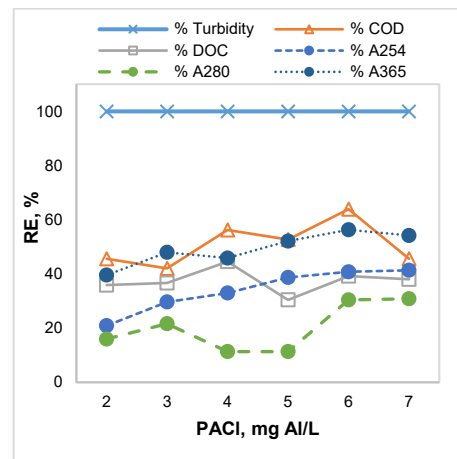

(b)

**Figure S2.** Removal efficiency of coagulation-flocculation process at 4°C (a) and 20°C (b) under short agitation time

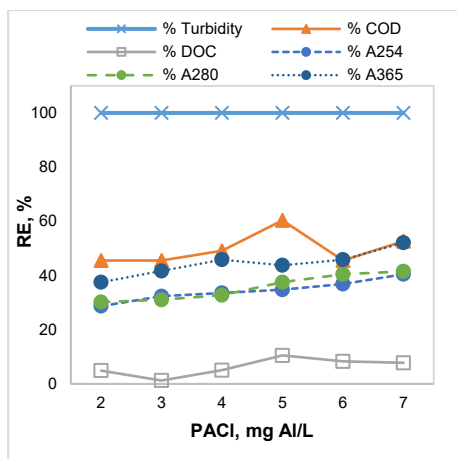

(a)

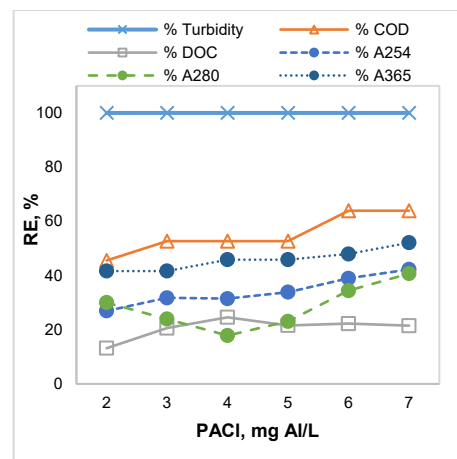

(b)

**Figure S3.** Removal efficiency of coagulation-flocculation process at 4°C (a) and 20°C (b) under low mixing intensity

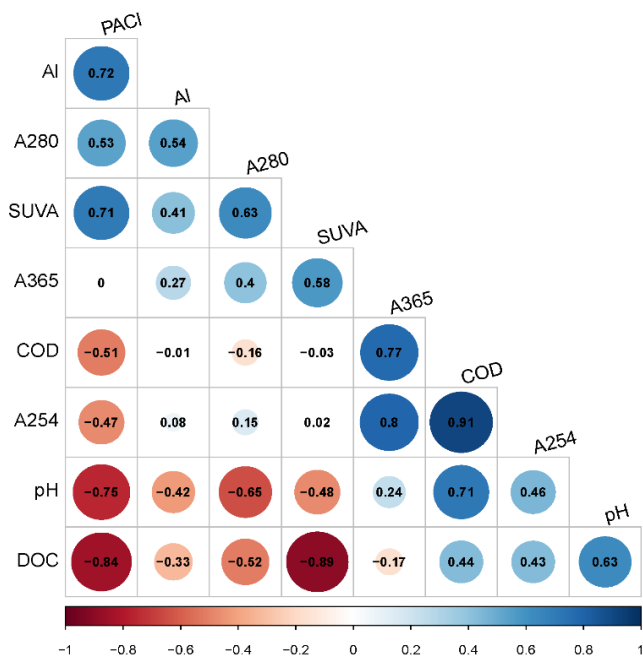

(a)

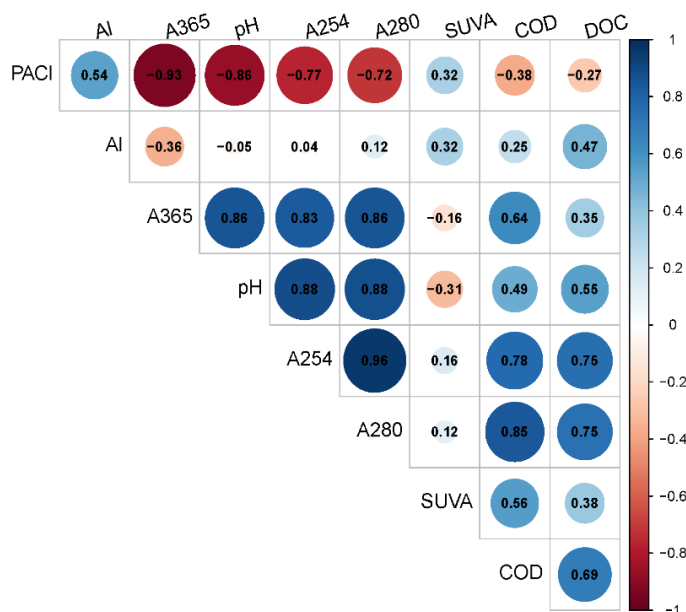

(b)

**Figure S4.** Correlation plots for test series T1 (a) and T3. Strength of correlation:  $r < 0.3$  “none or very weak”,  $0.3 \leq r < 0.5$  “weak”,  $0.5 \leq r < 0.7$  “moderate”,  $r \geq 0.7$  “strong”.

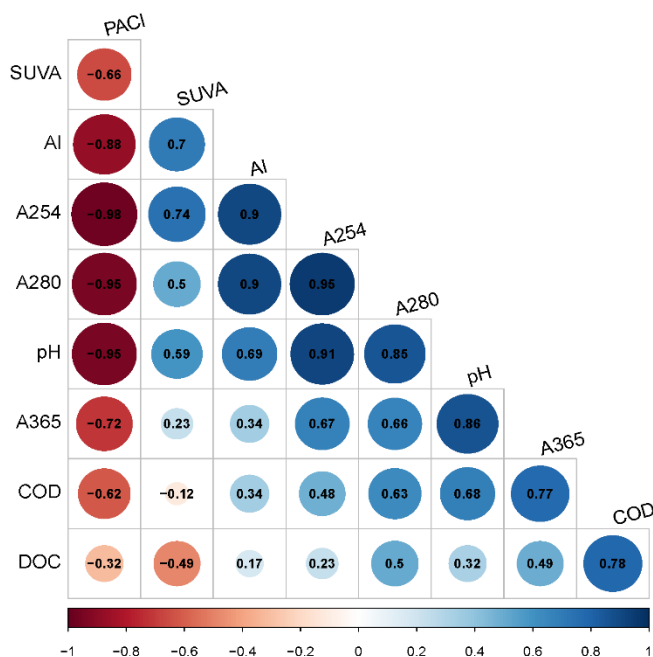

(a)

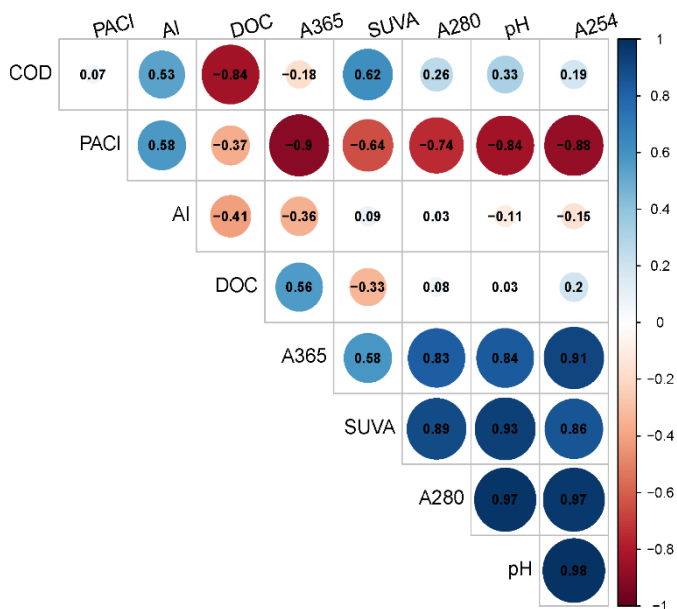

(b)

**Figure S5.** Correlation plots for test series T2 (a) and T4 (b). Strength of correlation:  $r < 0.3$  “none or very weak”,  $0.3 \leq r < 0.5$  “weak”,  $0.5 \leq r < 0.7$  “moderate”,  $r \geq 0.7$  “strong”.

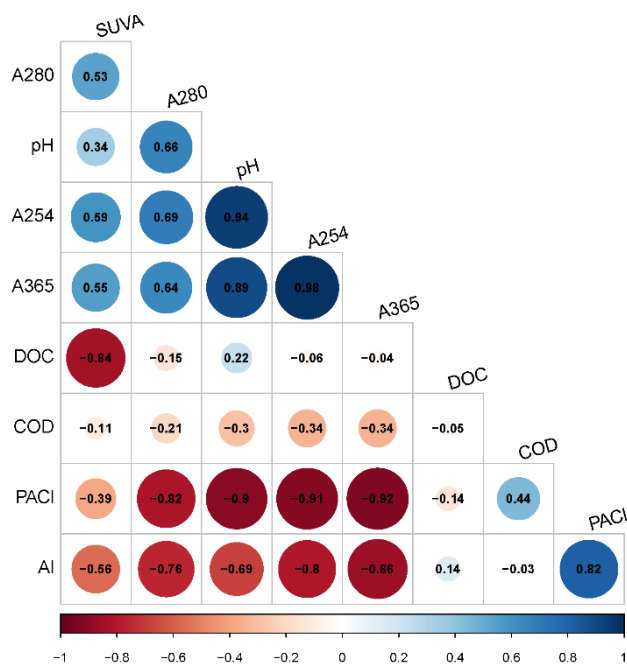

(a)

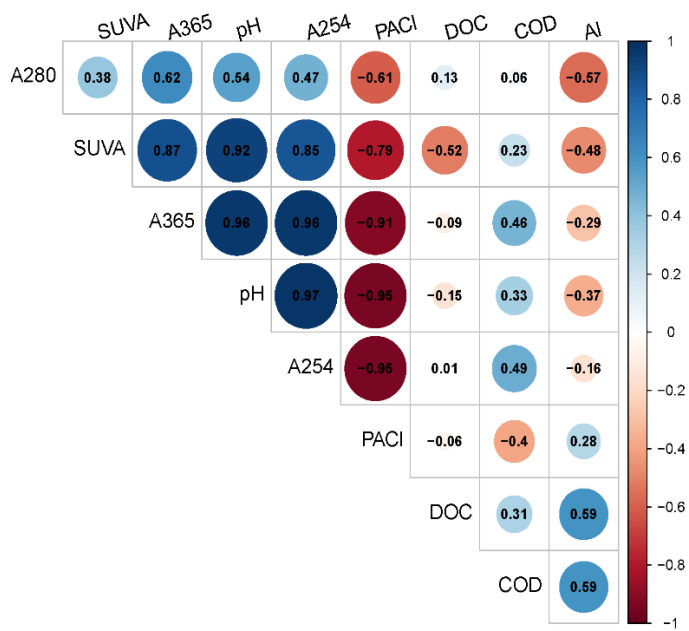

(b)

**Figure S6.** Correlation plots for test series T5 (a) and T7 (b). Strength of correlation:  $r < 0.3$  "none or very weak",  $0.3 \leq r < 0.5$  "weak",  $0.5 \leq r < 0.7$  "moderate",  $r \geq 0.7$  "strong".

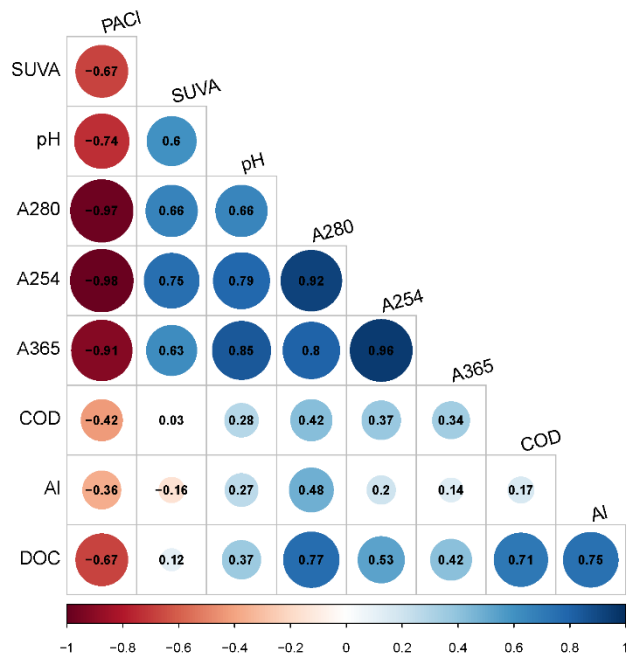

(a)

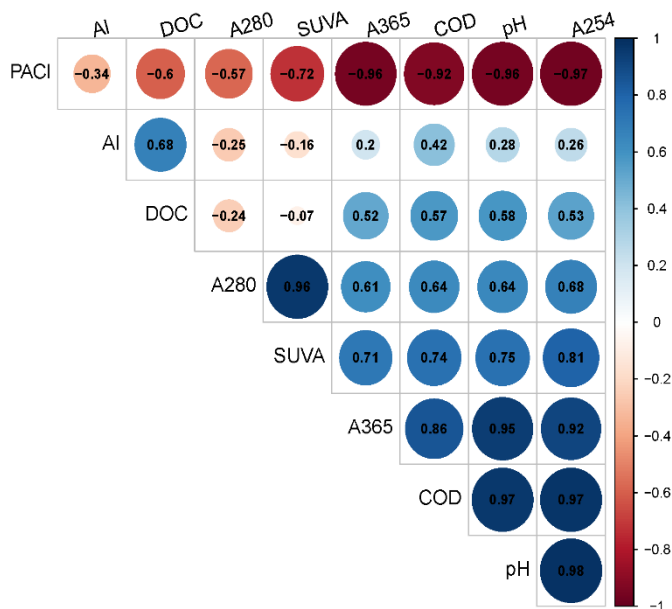

(b)

**Figure S7.** Correlation plots for test series T6 (a) and T8 (b). Strength of correlation:  $r < 0.3$  "none or very weak",  $0.3 \leq r < 0.5$  "weak",  $0.5 \leq r < 0.7$  "moderate",  $r \geq 0.7$  "strong".

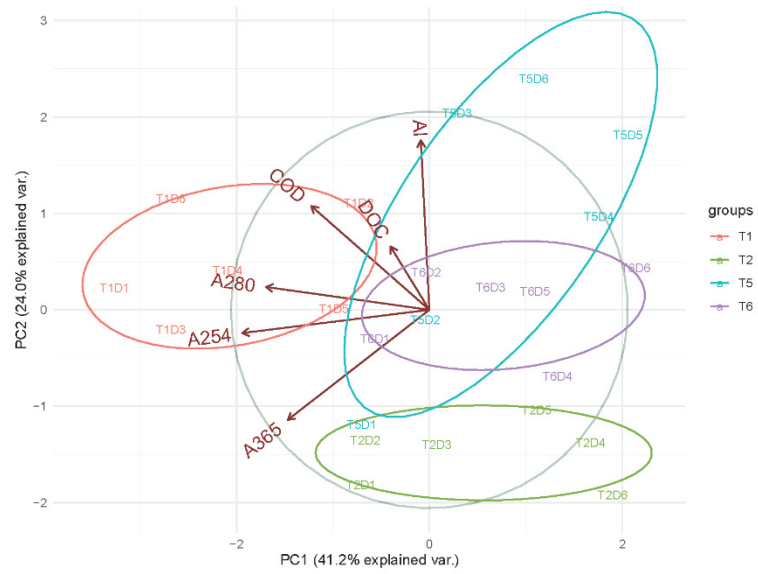

(a)

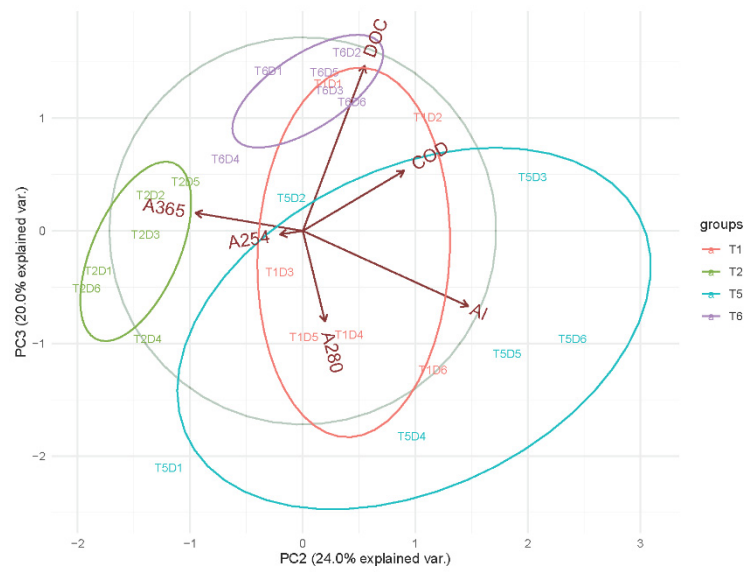

(b)

**Figure S8.** Principal component analysis for coagulation-flocculation tests at 4°C: (a) PC2 vs PC1 and (b) PC3 vs PC2. The notation D1...D6 represents the PACl dose in the range 2 -7 mg Al/L with an increment of 1.

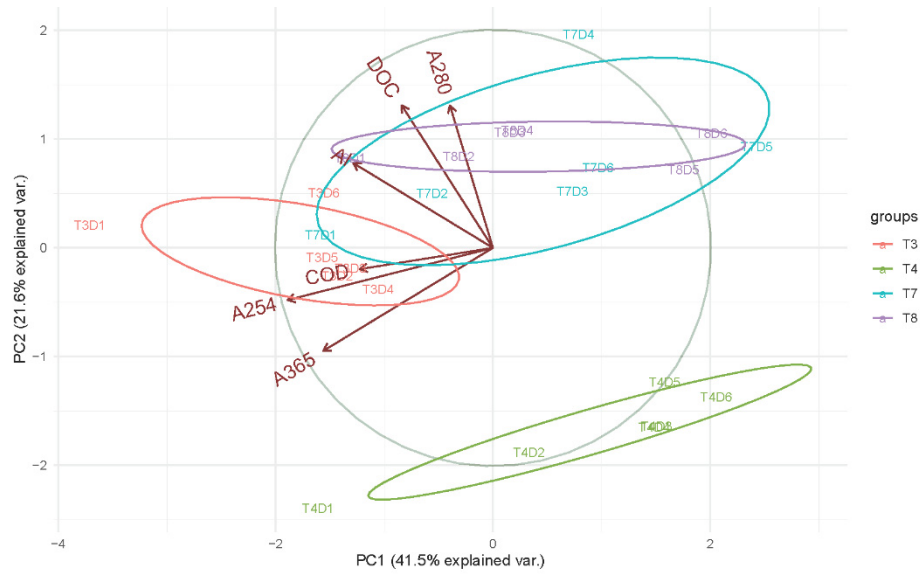

(a)

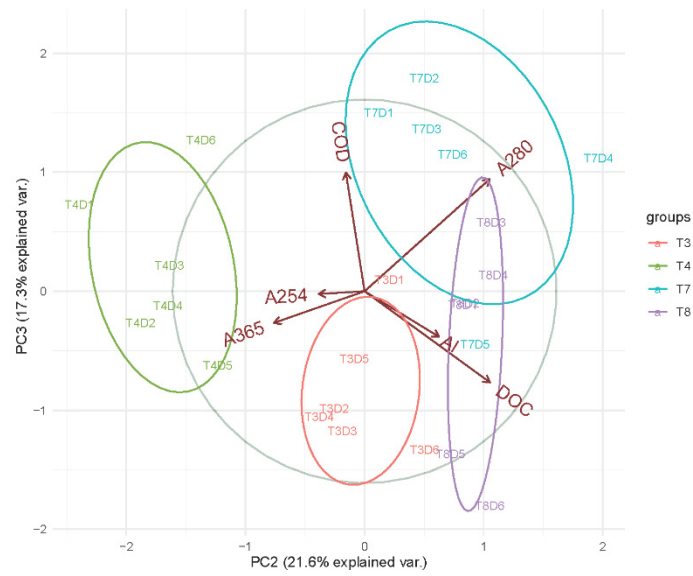

(b)

**Figure S9.** Principal component analysis for coagulation-flocculation tests at 20°C: **(a)** PC2 vs PC1 and **(b)** PC3 vs PC2. The notation D1...D6 represents the PACl dose in the range 2 -7 mg Al/L with an increment of 1.
